# Supplementary material
Source: PubMed Central journal article supplement (PMC9596382)
Supplement: mmc1.pdf [file mmc1.pdf]

## Supplemental information

### Potent cross-reactive antibodies following

### Omicron breakthrough in vaccinees

**Rungtiwa Nutalai, Daming Zhou, Aekkachai Tuekprakhon, Helen M. Ginn, Piyada Supasa, Chang Liu, Jiandong Huo, Alexander J. Mentzer, Helen M.E. Duyvesteyn, Aiste Dijokaite-Guraliuc, Donal Skelly, Thomas G. Ritter, Ali Amini, Sagida Bibi, Sandra Adele, Sile Ann Johnson, Bede Constantinides, Hermione Webster, Nigel Temperton, Paul Klenerman, Eleanor Barnes, Susanna J. Dunachie, Derrick Crook, Andrew J. Pollard, Teresa Lambe, Philip Goulder, OPTIC consortium, ISARIC4C consortium, Neil G. Paterson, Mark A. Williams, David R. Hall, Juthathip Mongkolsapaya, Elizabeth E. Fry, Wanwisa Dejnirattisai, Jingshan Ren, David I. Stuart, and Gavin R. Screaton**

Table S1. Omicron mAbs heavy and light chain variable gene usage and mutation analysis. Related to Figure 2.

| mAbs   | Patient No. | Heavy chain           |        |         |        | #Amino acid substitutions | K/λ                   | Light chain            |                           |  |
|--------|-------------|-----------------------|--------|---------|--------|---------------------------|-----------------------|------------------------|---------------------------|--|
|        |             | V-GENE                | J-GENE | D-GENE  | V-GENE |                           |                       | J-GENE                 | #Amino acid substitutions |  |
| Omi-02 | 07          | 1-69*01 , or 1-69D*01 | 2*01   | 2-21*02 | 7      | K                         | 3-20*01               | 5*01                   | 5                         |  |
| Omi-03 | 07          | 3-53*01               | 4*02   | 1-26*01 | 5      | K                         | 3-20*01               | 2*01                   | 0                         |  |
| Omi-06 | 07          | 4-4*07                | 3*02   | 3-16*02 | 4      | K                         | 1-39*01 , or 1D-39*01 | 4*01                   | 12                        |  |
| Omi-08 | 07          | 1-46*01 , or 1-46*03  | 4*02   | 6-13*01 | 12     | λ                         | 1-40*02               | 1*01                   | 4                         |  |
| Omi-09 | 07          | 3-30*01               | 3*02   | 4-17*01 | 6      | λ                         | 3-25*02               | 2*01 , or 3*01         | 4                         |  |
| Omi-12 | 08          | 1-58*02               | 3*02   | 2-2*01  | 12     | K                         | 3-20*01               | 1*01                   | 9                         |  |
| Omi-16 | 09          | 3-66*02               | 4*02   | 2-15*01 | 9      | K                         | 3-20*01               | 2*01                   | 7                         |  |
| Omi-17 | 09          | 3-66*02               | 4*02   | 6-19*01 | 7      | K                         | 3-20*01               | 2*01                   | 6                         |  |
| Omi-18 | 09          | 3-53*01               | 6*02   | 4-11*01 | 11     | λ                         | 3-21*02               | 1*01                   | 6                         |  |
| Omi-20 | 09          | 3-66*02               | 6*02   | 5-12*01 | 11     | K                         | 1-9*01                | 4*02                   | 5                         |  |
| Omi-23 | 12          | 4-31*03               | 4*02   | 3-22*01 | 6      | K                         | 1-NL1*01              | 1*01                   | 5                         |  |
| Omi-24 | 14          | 1-69*06               | 4*02   | 3-16*02 | 9      | K                         | 3-15*01               | 1*01                   | 7                         |  |
| Omi-25 | 14          | 3-9*01                | 6*02   | 3-16*01 | 6      | K                         | 1-39*01 , or 1D-39*01 | 2*01                   | 7                         |  |
| Omi-26 | 14          | 1-18*01               | 4*02   | 1-26*01 | 12     | λ                         | 1-36*01               | 3*02                   | 4                         |  |
| Omi-27 | 14          | 3-66*01 , or 3-66*04  | 6*02   | 6-19*01 | 8      | K                         | 1-6*01                | 2*01                   | 6                         |  |
| Omi-28 | 14          | 3-66*01 , or 3-66*04  | 4*02   | 3-16*01 | 4      | K                         | 3-20*01               | 1*01                   | 9                         |  |
| Omi-29 | 14          | 3-53*04               | 6*02   | 2-15*01 | 11     | λ                         | 2-14*01 , or 2-14*03  | 3*02                   | 6                         |  |
| Omi-30 | 14          | 1-69*06               | 6*02   | 2-15*01 | 10     | λ                         | 1-44*01               | 3*02                   | 7                         |  |
| Omi-31 | 14          | 1-69*06               | 6*02   | 3-16*01 | 11     | λ                         | 1-44*01               | 3*02                   | 6                         |  |
| Omi-32 | 08          | 3-33*01 , or 3-33*06  | 4*02   | 2-21*02 | 6      | K                         | 3-20*01               | 4*01                   | 6                         |  |
| Omi-33 | 08          | 3-33*01 , or 3-33*06  | 4*02   | 2-21*02 | 10     | K                         | 3-20*01               | 4*01                   | 4                         |  |
| Omi-34 | 09          | 1-69*06 , or 1-69*14  | 4*02   | 2-2*01  | 10     | λ                         | 1-40*01               | 1*01                   | 6                         |  |
| Omi-35 | 09          | 3-9*01                | 6*02   | 2-2*02  | 5      | λ                         | 3-21*02               | 2*01 , or 3*01         | 7                         |  |
| Omi-36 | 09          | 3-66*02               | 4*02   | 2-15*01 | 9      | K                         | 3-20*01               | 2*01                   | 5                         |  |
| Omi-38 | 15          | 1-69*09               | 3*01   | 1-26*01 | 16     | K                         | 1-5*01                | 5*01                   | 10                        |  |
| Omi-39 | 07          | 3-43*01               | 6*03   | 2-2*01  | 8      | K                         | 4-1*01                | 3*01                   | 6                         |  |
| Omi-41 | 08          | 1-18*04               | 4*02   | 3-9*01  | 11     | K                         | 4-1*01                | 2*02 ()                | 5                         |  |
| Omi-42 | 09          | 3-9*01                | 6*02   | 6-19*01 | 7      | λ                         | 2-8*01                | 2*01 , or 3*01 or 3*02 | 5                         |  |

Table S2A. VoC and Omicron neutralization data for Omicron mAbs. Related to Figure 3.

| mAbs       | IC50 (ug/ml)  |               |               |               |               |               |               |                |
|------------|---------------|---------------|---------------|---------------|---------------|---------------|---------------|----------------|
|            | Victoria      | Alpha         | Beta          | Gamma         | Delta         | BA.1          | BA.1.1        | BA.2           |
| Omi-02     | 0.015 ± 0.001 | 0.014 ± 0.005 | 0.009 ± 0.000 | 0.004 ± 0.000 | 0.014 ± 0.003 | 0.013 ± 0.001 | 0.015 ± 0.001 | 0.040 ± 0.021  |
| Omi-03     | 0.007 ± 0.000 | 0.012 ± 0.007 | 0.009 ± 0.001 | 0.004 ± 0.000 | 0.004 ± 0.000 | 0.009 ± 0.002 | 0.015 ± 0.000 | 0.028 ± 0.002  |
| Omi-06     | 0.007 ± 0.001 | 0.011 ± 0.002 | 0.012 ± 0.000 | 0.010 ± 0.003 | 5.040 ± 0.747 | 0.054 ± 0.005 | 1.505 ± 0.341 | 0.238 ± 0.007  |
| Omi-08     | 0.014 ± 0.007 | 0.022 ± 0.002 | 0.007 ± 0.000 | 0.024 ± 0.007 | 0.048 ± 0.012 | 0.008 ± 0.004 | 0.007 ± 0.001 | 1.510 ± 0.683  |
| Omi-09     | 0.004 ± 0.001 | 0.002 ± 0.000 | 1.218 ± 0.324 | 2.373 ± 1.008 | 0.008 ± 0.002 | 0.011 ± 0.005 | 0.017 ± 0.003 | 0.034 ± 0.010  |
| Omi-12     | 0.005 ± 0.000 | 0.003 ± 0.001 | 0.006 ± 0.001 | 0.003 ± 0.000 | 0.003 ± 0.000 | 0.004 ± 0.001 | 0.009 ± 0.001 | 0.010 ± 0.001  |
| Omi-16     | 0.016 ± 0.002 | 0.022 ± 0.009 | 0.018 ± 0.004 | 0.022 ± 0.007 | 0.016 ± 0.002 | 0.019 ± 0.003 | 0.027 ± 0.007 | 0.067 ± 0.021  |
| Omi-17     | 0.066 ± 0.015 | 0.098 ± 0.027 | 0.021 ± 0.007 | 0.021 ± 0.007 | 0.074 ± 0.019 | 0.028 ± 0.005 | 0.026 ± 0.001 | 0.095 ± 0.008  |
| Omi-18     | 0.041 ± 0.005 | 0.038 ± 0.008 | 0.018 ± 0.006 | 0.016 ± 0.004 | 0.025 ± 0.000 | 0.006 ± 0.003 | 0.006 ± 0.001 | 0.007 ± 0.001  |
| Omi-20     | 0.012 ± 0.002 | 0.023 ± 0.004 | 0.019 ± 0.009 | 0.019 ± 0.006 | 0.008 ± 0.001 | 0.043 ± 0.012 | 0.032 ± 0.002 | 0.022 ± 0.005  |
| Omi-23     | 0.005 ± 0.002 | 0.009 ± 0.004 | 0.020 ± 0.005 | 0.018 ± 0.006 | 0.006 ± 0.002 | 0.044 ± 0.013 | 0.03 ± 0.001  | 0.028 ± 0.001  |
| Omi-24     | 0.005 ± 0.001 | 0.008 ± 0.003 | 0.006 ± 0.001 | 0.010 ± 0.005 | >10           | 0.007 ± 0.001 | 0.035 ± 0.010 | 0.008 ± 0.002  |
| Omi-25     | 0.003 ± 0.001 | 0.007 ± 0.001 | 0.059 ± 0.007 | 0.257 ± 0.079 | 0.006 ± 0.002 | 0.046 ± 0.015 | 0.138 ± 0.046 | 0.056 ± 0.030  |
| Omi-26     | 0.005 ± 0.000 | 0.010 ± 0.003 | 0.055 ± 0.020 | 0.214 ± 0.046 | 0.005 ± 0.001 | 0.034 ± 0.000 | 0.055 ± 0.030 | 0.03 ± 0.011   |
| Omi-27     | 0.026 ± 0.001 | 0.032 ± 0.012 | 0.019 ± 0.006 | 0.017 ± 0.006 | 0.010 ± 0.001 | 0.091 ± 0.050 | 0.239 ± 0.052 | 0.039 ± 0.006  |
| Omi-28     | 0.028 ± 0.004 | 0.028 ± 0.001 | 0.019 ± 0.010 | 0.033 ± 0.008 | 0.018 ± 0.002 | 0.032 ± 0.009 | 0.075 ± 0.032 | 0.047 ± 0.010  |
| Omi-29     | 0.044 ± 0.002 | 0.066 ± 0.034 | 0.048 ± 0.020 | 0.040 ± 0.007 | 0.029 ± 0.004 | 0.036 ± 0.003 | 0.052 ± 0.004 | 0.192 ± 0.021  |
| Omi-30     | 0.109 ± 0.035 | 0.043 ± 0.016 | 0.028 ± 0.009 | 0.038 ± 0.004 | >10           | 0.058 ± 0.008 | 0.084 ± 0.021 | 0.045 ± 0.010  |
| Omi-31     | 0.007 ± 0.001 | 0.020 ± 0.003 | 0.011 ± 0.005 | 0.017 ± 0.006 | >10           | 0.010 ± 0.002 | 0.017 ± 0.009 | 0.083 ± 0.040  |
| Omi-32     | 0.032 ± 0.016 | 0.102 ± 0.041 | 0.460 ± 0.092 | 0.430 ± 0.012 | 0.012 ± 0.002 | 0.024 ± 0.011 | 4.642 ± 0.283 | 1.899 ± 0.280  |
| Omi-33     | 0.028 ± 0.005 | 0.057 ± 0.017 | 0.136 ± 0.002 | 0.132 ± 0.037 | 0.011 ± 0.001 | 0.026 ± 0.008 | 0.113 ± 0.035 | 0.681 ± 0.0170 |
| Omi-34     | 0.003 ± 0.001 | 0.041 ± 0.027 | 0.003 ± 0.000 | 0.008 ± 0.002 | >10           | 0.028 ± 0.009 | 0.074 ± 0.016 | 0.014 ± 0.003  |
| Omi-35     | 0.057 ± 0.003 | 0.080 ± 0.030 | 0.128 ± 0.058 | 0.136 ± 0.024 | 0.280 ± 0.059 | 0.069 ± 0.032 | 0.262 ± 0.086 | 0.082 ± 0.043  |
| Omi-36     | 0.056 ± 0.008 | 0.047 ± 0.009 | 0.018 ± 0.001 | 0.015 ± 0.000 | 0.026 ± 0.003 | 0.038 ± 0.006 | 0.053 ± 0.022 | 0.105 ± 0.023  |
| Omi-38     | 0.001 ± 0.000 | 0.009 ± 0.001 | 0.004 ± 0.000 | 0.002 ± 0.000 | 0.004 ± 0.001 | 0.054 ± 0.028 | >10           | 0.027 ± 0.001  |
| Omi-39     | 0.015 ± 0.006 | 0.039 ± 0.007 | 0.009 ± 0.000 | 0.014 ± 0.001 | 0.012 ± 0.007 | 0.025 ± 0.004 | >10           | 0.073 ± 0.014  |
| Omi-41     | 0.090 ± 0.013 | 2.262 ± 1.199 | >10           | 0.126 ± 0.059 | >10           | 0.081 ± 0.004 | 0.191 ± 0.014 | >10            |
| Omi-42     | 0.016 ± 0.003 | 0.024 ± 0.001 | 0.011 ± 0.004 | 0.013 ± 0.003 | 0.019 ± 0.001 | 0.014 ± 0.002 | 0.017 ± 0.004 | 0.031 ± 0.008  |
| REGN10987  | 0.032 ± 0.007 | 0.028 ± 0.003 | 0.007 ± 0.001 | 0.013 ± 0.002 | 0.017 ± 0.009 | >10           | >10           | 1.847 ± 1.231  |
| REGN10933  | 0.004 ± 0.002 | 0.014 ± 0.002 | 3.284 ± 2.014 | 6.177 ± 1.914 | 0.003 ± 0.001 | >10           | >10           | >10            |
| AZD1061    | 0.013 ± 0.003 | 0.012 ± 0.002 | 0.014 ± 0.002 | 0.007 ± 0.002 | 0.038 ± 0.006 | 3.488 ± 2.085 | >10           | 0.028 ± 0.014  |
| AZD8895    | 0.005 ± 0.001 | 0.011 ± 0.002 | 0.046 ± 0.031 | 0.046 ± 0.016 | 0.003 ± 0.000 | 1.152 ± 0.170 | 6.078 ± 1.558 | 7.702 ± 2.224  |
| AZD7442    | 0.009 ± 0.000 | 0.007 ± 0.001 | 0.012 ± 0.001 | 0.006 ± 0.003 | 0.005 ± 0.000 | 0.273 ± 0.062 | 3.816 ± 0.138 | 0.052 ± 0.004  |
| ADG10      | 0.006 ± 0.000 | 0.010 ± 0.001 | 0.011 ± 0.001 | 0.003 ± 0.000 | 0.026 ± 0.005 | >10           | >10           | >10            |
| ADG20      | 0.004 ± 0.001 | 0.006 ± 0.000 | 0.01 ± 0.001  | 0.009 ± 0.000 | 0.006 ± 0.001 | 1.104 ± 0.509 | 1.269 ± 0.223 | >10            |
| ADG30      | 0.007 ± 0.002 | 0.016 ± 0.001 | 0.029 ± 0.003 | 0.002 ± 0.001 | 0.033 ± 0.007 | >10           | >10           | >10            |
| Ly-CoV-555 | 0.006 ± 0.002 | 0.009 ± 0.000 | >10           | >10           | 8.311 ± 4.059 | >10           | >10           | >10            |
| Ly-CoV16   | 0.034 ± 0.007 | 3.225 ± 1.030 | >10           | >10           | 0.012 ± 0.002 | >10           | >10           | >10            |
| S309       | 0.040 ± 0.005 | 0.078 ± 0.069 | 0.082 ± 0.002 | 0.076 ± 0.014 | 0.113 ± 0.028 | 0.256 ± 0.034 | 1.119 ± 0.119 | 5.035 ± 0.244  |

Table S2B. Neutralization data for early pandemic and Beta mAbs. Related to Figure 3.

| Early pandemic mAbs | IC50 (ug/ml)  |               |               |               |
|---------------------|---------------|---------------|---------------|---------------|
|                     | Victoria      | BA.1          | BA.1.1        | BA.2          |
| 40                  | 0.006 ± 0.002 | 1.705 ± 0.840 | 0.544 ± 0.007 | 0.100 ± 0.007 |
| 55                  | 0.006 ± 0.002 | >10           | >10           | >10           |
| 58                  | 0.019 ± 0.004 | 0.060 ± 0.041 | 0.876 ± 0.135 | 0.043 ± 0.007 |
| 88                  | 0.005 ± 0.002 | >10           | >10           | >10           |
| 132                 | 0.012 ± 0.004 | >10           | >10           | >10           |
| 150                 | 0.008 ± 0.004 | >10           | 3.500 ± 0.712 | >10           |
| 158                 | 0.021 ± 0.006 | >10           | 2.843 ± 0.733 | 4.249 ± 0.694 |
| 159                 | >10           | >10           | >10           | >10           |
| 165                 | 0.007 ± 0.005 | >10           | >10           | >10           |
| 170                 | 0.006 ± 0.001 | >10           | >10           | >10           |
| 175                 | 0.012 ± 0.004 | >10           | >10           | >10           |
| 222                 | 0.006 ± 0.000 | 0.021 ± 0.002 | 0.023 ± 0.001 | 0.249 ± 0.082 |
| 253                 | 0.021 ± 0.009 | 0.875 ± 0.373 | 0.415 ± 0.161 | 1.100 ± 0.049 |
| 269                 | 0.008 ± 0.004 | >10           | >10           | >10           |
| 278                 | 0.001 ± 0.000 | >10           | >10           | 0.326 ± 0.011 |
| 281                 | 0.001 ± 0.000 | >10           | >10           | >10           |
| 316                 | 0.001 ± 0.000 | >10           | >10           | >10           |
| 318                 | 0.012 ± 0.003 | 9.490 ± 4.540 | >10           | 0.303 ± 0.190 |
| 384                 | 0.001 ± 0.000 | >10           | >10           | >10           |
| 398                 | 0.072 ± 0.065 | >10           | >10           | >10           |
| 253+55              | 0.001 ± 0.000 | 0.638 ± 0.315 | 0.451 ± 0.014 | >10           |
| 253+165             | 0.001 ± 0.000 | >10           | 6.591 ± 0.799 | >10           |

  

| Beta mAbs | IC50 (ug/ml)  |               |               |               |
|-----------|---------------|---------------|---------------|---------------|
|           | Beta          | BA.1          | BA.1.1        | BA.2          |
| β06       | 0.005 ± 0.001 | >10           | >10           | >10           |
| β10       | 0.021 ± 0.008 | >10           | >10           | >10           |
| β20       | 0.006 ± 0.002 | 5.679 ± 0.452 | 1.836 ± 0.780 | >10           |
| β22       | 0.041 ± 0.014 | 0.479 ± 0.029 | 0.130 ± 0.005 | >10           |
| β23       | 0.005 ± 0.001 | >10           | >10           | >10           |
| β24       | 0.002 ± 0.000 | >10           | >10           | >10           |
| β26       | 0.004 ± 0.001 | >10           | >10           | >10           |
| β27       | 0.003 ± 0.001 | 0.766 ± 0.043 | 0.274 ± 0.095 | 0.348 ± 0.030 |
| β29       | 0.009 ± 0.000 | 0.095 ± 0.029 | 0.066 ± 0.002 | 4.029 ± 0.402 |
| β30       | 0.002 ± 0.000 | >10           | >10           | >10           |
| β32       | 0.023 ± 0.001 | >10           | >10           | >10           |
| β33       | 0.020 ± 0.002 | >10           | >10           | >10           |
| β34       | 0.030 ± 0.004 | >10           | >10           | >10           |
| β38       | 0.004 ± 0.001 | >10           | >10           | >10           |
| β40       | 0.001 ± 0.000 | 0.005 ± 0.001 | 0.002 ± 0.000 | 0.008 ± 0.002 |
| β43       | 0.014 ± 0.003 | >10           | >10           | >10           |
| β44       | 0.008 ± 0.001 | >10           | >10           | >10           |
| β45       | 0.010 ± 0.001 | >10           | >10           | >10           |
| β47       | 0.002 ± 0.000 | 0.018 ± 0.009 | 0.011 ± 0.002 | 0.044 ± 0.006 |
| β48       | 0.003 ± 0.001 | 5.706 ± 0.676 | 0.752 ± 0.052 | 5.042 ± 0.650 |
| β49       | 0.014 ± 0.004 | >10           | >10           | >10           |
| β50       | 0.008 ± 0.001 | >10           | >10           | >10           |
| β51       | 0.003 ± 0.000 | >10           | >10           | >10           |
| β53       | 0.007 ± 0.001 | 0.141 ± 0.026 | 5.849 ± 0.036 | 0.170 ± 0.073 |
| β54       | 0.002 ± 0.000 | 0.003 ± 0.001 | 0.001 ± 0.000 | 0.076 ± 0.029 |
| β55       | 0.009 ± 0.002 | 0.033 ± 0.008 | 0.009 ± 0.001 | 0.069 ± 0.008 |

**Table S3A. X-ray data collection and structure refinement statistics. Related to Figures 5-7.**

| Structure                                           | BA.1 RBD/<br>Omi3-EY6A           | BA.1 RBD/<br>Omi9-NbF2 | BA.1 RBD/<br>Omi12-<br>Beta54 <sup>a</sup> | Omi12 Fab <sup>a</sup> | BA.2 RBD/<br>ACE2    | BA.2 RBD/150        | BA.2 RBD/150        | BA.1 RBD/<br>Omi6-150 | BA.1 RBD/<br>Omi18-Omi31-<br>NbC1 | Beta RBD/<br>Omi18-Omi31-<br>NbC1 | BA.1 RBD/<br>Omi25  | BA.1 RBD/<br>Omi32-NbC1 | Omi42 Fab           |
|-----------------------------------------------------|----------------------------------|------------------------|--------------------------------------------|------------------------|----------------------|---------------------|---------------------|-----------------------|-----------------------------------|-----------------------------------|---------------------|-------------------------|---------------------|
| PDB ID                                              | 7ZF3                             | 7ZF4                   | 7ZF5                                       | 7ZF6                   | 7ZF7                 | 7ZF8                | 7ZF9                | 7ZFA                  | 7ZFB                              | 7ZFC                              | 7ZFD                | 7ZFE                    | 7ZFF                |
| <b>Data collection</b>                              |                                  |                        |                                            |                        |                      |                     |                     |                       |                                   |                                   |                     |                         |                     |
| Space group                                         | <i>P</i> 212121                  | <i>C</i> 2221          | <i>P</i> 21                                | <i>C</i> 2221          | <i>P</i> 41212       | <i>C</i> 2          | <i>P</i> 21         | <i>P</i> 1            | <i>P</i> 21                       | <i>P</i> 3121                     | <i>P</i> 43212      | <i>P</i> 21             | <i>P</i> 21         |
| Cell dimensions<br><i>a, b, c</i> (Å)               | 87.5, 119.9, 134.0               | 86.6, 205.1, 123.1     | 95.7, 156.3, 122.4                         | 65.0, 210.1, 85.9      | 104.2, 104.2, 223.7  | 194.2, 94.9, 58.4   | 90.0, 83.9, 110.7   | 82.8, 114.8, 144.6    | 111.2, 135.1, 112.2               | 105.0, 105.0, 234.5               | 123.0, 123.0, 223.7 | 98.5, 159.9, 133.3      | 63.8, 49.4, 72.3    |
| $\alpha, \beta, \gamma$ (°)                         | 90, 90, 90                       | 90, 90, 90             | 90, 90, 3.90                               | 90, 90, 90             | 90, 90, 90           | 90, 101.0, 90       | 90, 102.0, 90       | 82.0, 80.6, 86.2      | 90, 101.7, 90                     | 90, 90, 120                       | 90, 90, 90          | 90, 106.9, 90           | 90, 115.6, 90       |
| Resolution (Å)                                      | 73–3.15 (3.20-3.15) <sup>b</sup> | 77–4.18 (4.25-4.18)    | 78–5.50 (5.60-5.50)                        | 53–2.08 (2.12-2.08)    | 76–3.46 (3.52-3.46)  | 95–2.95 (3.00-2.95) | 66–3.25 (3.30-3.25) | 114–4.24 (4.74-4.24)  | 87–3.08 (3.13-3.08)               | 85–3.24 (3.29-3.24)               | 69–3.39 (3.45-3.39) | 81–3.25 (3.76-3.25)     | 65–2.32 (2.36-2.32) |
| <i>R</i> merge                                      | 0.491 (---)                      | 0.728 (---)            | 0.641 (---)                                | 0.179 (---)            | 0.703 (---)          | 0.490 (---)         | 0.629 (---)         | 0.330 (---)           | 0.264 (---)                       | 0.265 (---)                       | ---                 | 0.241 (---)             | 0.182 (---)         |
| <i>R</i> pim                                        | 0.136 (0.932)                    | 0.207 (1.34)           | 0.259 (0.919)                              | 0.052 (1.151)          | 0.138 (1.560)        | 0.198 (0.916)       | 0.173 (1.172)       | 0.205 (0.503)         | 0.073 (1.623)                     | 0.073 (0.946)                     | 0.233 (1.175)       | 0.097 (0.527)           | 0.078 (1.082)       |
| <i>I</i> / ( <i>I</i> )                             | 5.0 (0.6)                        | 2.5 (0.4)              | 2.1 (0.4)                                  | 6.2 (0.2)              | 3.1 (0.3)            | 2.1 (0.3)           | 3.2 (0.4)           | 2.6 (1.6)             | 5.0 (0.2)                         | 6.6 (0.3)                         | 2.4 (0.4)           | 6.6 (1.6)               | 8.0 (0.5)           |
| <i>CC</i> 1/2                                       | 0.955 (0.328)                    | 0.877 (0.340)          | 0.849 (0.332)                              | 0.994 (0.255)          | 0.992 (0.317)        | 0.939 (0.303)       | 0.971 (0.428)       | 0.918 (0.590)         | 0.997 (0.286)                     | 0.995 (0.298)                     | 0.967 (0.314)       | 0.995 (0.474)           | 0.993 (0.348)       |
| Completeness (%)                                    | 100 (99.2)                       | 100 (98.3)             | 100 (98.2)                                 | 93.3 (62.9)            | 99.6 (99.3)          | 100 (99.8)          | 99.9 (97.9)         | 82.9 (74.8)           | 100 (100)                         | 100 (98.4)                        | 100 (99.7)          | 87.8 (49.0)             | 92.6 (54.7)         |
| Redundancy                                          | 13.7 (14.2)                      | 13.4 (13.1)            | 7.1 (7.4)                                  | 12.1 (6.8)             | 26.4 (27.8)          | 7.0 (6.7)           | 14.2 (14.7)         | 3.5 (3.5)             | 14.1 (13.5)                       | 14.1 (14.3)                       | 26.8 (28.3)         | 7.1 (7.0)               | 6.2 (3.7)           |
| <b>Refinement</b>                                   |                                  |                        |                                            |                        |                      |                     |                     |                       |                                   |                                   |                     |                         |                     |
| Resolution (Å)                                      | 73–3.15                          | 62–4.18 <sup>c</sup>   | 78–5.50 <sup>c</sup>                       | 53–2.08                | 76–3.46 <sup>c</sup> | 57–2.95             | 62–3.25             | 114–4.24 <sup>c</sup> | 71–3.08                           | 85–3.24                           | 69–3.39             | 81–3.25                 | 65–2.32             |
| No. reflections                                     | 23771/1232                       | 7769/415               | 11051/615                                  | 29710/1547             | 15216/802            | 18383/976           | 24438/1205          | 11920/595             | 50808/2718                        | 23355/1202                        | 23272/1216          | 26894/1395              | 15619/865           |
| <i>R</i> work / <i>R</i> free                       | 0.208/0.266                      | 0.369/0.385            | 0.284/0.283                                | 0.235/0.265            | 0.258/0.269          | 0.220/0.258         | 0.199/0.231         | 0.237/0.273           | 0.261/0.308                       | 0.244/0.299                       | 0.286/0.338         | 0.237/0.293             | 0.231/0.269         |
| Protein atoms #                                     | 8063                             | 5757                   | 16328                                      | 3320                   | 6420                 | 4798                | 9611                | 32080                 | 17908                             | 8914                              | 9605                | 22831                   | 3231                |
| Ligand/ion/water #                                  | 32                               |                        |                                            | 133                    | 85                   |                     | 28                  |                       |                                   |                                   |                     |                         | 109                 |
| Protein <i>B</i> factors (Å <sup>2</sup> )          | 79                               | 192                    | 248                                        | 59                     | 126                  | 56                  | 94                  | 104                   | 178                               | 143                               | 100                 | 99                      | 49                  |
| Ligand/ion/water <i>B</i> factors (Å <sup>2</sup> ) | 74                               |                        |                                            | 74                     | 149                  |                     | 135                 |                       |                                   |                                   |                     |                         | 51                  |
| RMSD Bond length (Å)                                | 0.002                            | 0.008                  | 0.010                                      | 0.002                  | 0.002                | 0.002               | 0.002               | 0.008                 | 0.004                             | 0.003                             | 0.003               | 0.002                   | 0.002               |
| RMSD Bond angles (°)                                | 0.5                              | 1.0                    | 0.7                                        | 0.6                    | 0.5                  | 0.5                 | 0.5                 | 1.2                   | 0.7                               | 0.5                               | 0.6                 | 0.6                     | 0.5                 |

<sup>a</sup> Omi12 is glycosylated at N102 of the heavy chain. <sup>b</sup> Values in parentheses are for highest-resolution shell. <sup>c</sup> Rigid body and group B-factor refinement only.

**Table S3B. Cryo-EM data collection, refinement and validation statistics of spike/Fab complexes. Related to Figures 5-7.**

|                                                     | Omi-2/Beta Spike ectodomain<br>7ZR9/EMD-14887       | Omi-38/Beta Spike ectodomain<br>7ZRC, EMD-14910 | Omi-38/Beta Spike RBD (local refinement)<br>7ZR8/EMD-14886           | Omi-42/Beta Spike ectodomain<br>7ZR7/EMD-14885 |
|-----------------------------------------------------|-----------------------------------------------------|-------------------------------------------------|----------------------------------------------------------------------|------------------------------------------------|
| PDB ID / EMD ID                                     |                                                     |                                                 |                                                                      |                                                |
| <b>Data collection and processing</b>               |                                                     |                                                 |                                                                      |                                                |
| Microscope, Detector, Mode                          | Glacios, Falcon-III, linear                         | Krios, K3, superresolution                      | Krios, K3, superresolution                                           | Krios, K3, superresolution                     |
| Voltage / kV                                        | 200                                                 | 300                                             | 300                                                                  | 300                                            |
| Electron exposure (e <sup>-</sup> /Å <sup>2</sup> ) | 50.0                                                | 50.2                                            | 50.2                                                                 | 50.2                                           |
| Defocus Range (um)                                  | -1.5 to -3.5 [0.5]                                  | -0.8 to -2.6 [0.3]                              | -0.8 to -2.6 [0.3]                                                   | -0.8 to -2.6 [0.3]                             |
| Nominal magnification kX                            | 92                                                  | 105                                             | 105                                                                  | 105                                            |
| Pixel size [super res] (Å)                          | 1.22                                                | 0.83                                            | 0.83                                                                 | 0.83                                           |
| Symmetry imposed                                    | C1                                                  | C1                                              | C1                                                                   | C1                                             |
| Particles in final reconstruction                   | 182,828                                             | 201,474                                         | 201,474                                                              | 106,884                                        |
| Map resolution in Å (                               | 4.0                                                 | 2.9                                             | 3.7                                                                  | 3.6                                            |
| FSC threshold                                       | 0.143                                               | 0.143                                           | 0.143                                                                | 0.143                                          |
| <b>Refinement</b>                                   |                                                     |                                                 |                                                                      |                                                |
| Initial model                                       | 7Q9G Spike, AlphaFold Fab                           | 7Q9G Spike AlphaFold Fab                        | 7Q9G Spike AlphaFold Fab                                             | 7Q9G Spike AlphaFold Fab                       |
| RBD conformation                                    | Two-up, one poorly resolved, two clearly decorated. | Two mostly up, one tilted.                      | Two mostly up, one tilted, all decorated, but less clear for tilted. | Three-up, all decorated.                       |
| FSC threshold                                       | 0.143                                               | 0.143                                           | 0.143                                                                | 0.143                                          |
| Map sharpening B factor (Å <sup>2</sup> )           | -193                                                | -69                                             | -106                                                                 | -95                                            |
| Model non-hydrogen atoms                            | 31014                                               | 30724                                           | 3693                                                                 | 30767                                          |
| Protein residues                                    | 3899                                                | 3852                                            | 471                                                                  | 3878                                           |
| Ligands                                             | 54                                                  | 52                                              | 1                                                                    | 54                                             |
| Protein mean <i>B</i> factor (Å <sup>2</sup> )      | 238.1                                               | 30.3                                            | 31.2                                                                 | 213.7                                          |
| Ligand mean <i>B</i> factor (Å <sup>2</sup> )       | 130.9                                               | 42.9                                            | 21.8                                                                 | 167.6                                          |
| RMSD Bond lengths (Å)                               | 0.006                                               | 0.006                                           | 0.003                                                                | 0.003                                          |
| RMSD Bond angles (°)                                | 0.857                                               | 0.596                                           | 0.458                                                                | 0.496                                          |
| Correlation Coefficient                             | 0.76                                                | 0.75                                            | 0.82                                                                 | 0.79                                           |
| <b>Validation</b>                                   |                                                     |                                                 |                                                                      |                                                |
| MolProbity score                                    | 1.76                                                | 1.61                                            | 1.65                                                                 | 1.58                                           |
| Clashscore                                          | 8.11                                                | 7.36                                            | 7.02                                                                 | 6.01                                           |
| Poor rotamers (%)                                   | 1.22                                                | 0.93                                            | 0.74                                                                 | 0.82                                           |
| Ramachandran plot                                   |                                                     |                                                 |                                                                      |                                                |
| Favored (%)                                         | 96.2                                                | 96.7                                            | 96.1                                                                 | 96.3                                           |
| Allowed (%)                                         | 3.69                                                | 3.3                                             | 3.9                                                                  | 3.7                                            |
| Disallowed (%)                                      | 0.1                                                 | 0.0                                             | 0.0                                                                  | 0.03                                           |
